# Supplementary material
Source: publisher site journal article supplement (https://www.dovepress.com/article/332755)
Supplement: Supplementary file 1 [file get_supplementary_file.php]

**Table S1** HRs (95% CIs) for all-cause mortality across groups of plasma lipid levels

|  | Model 1 | | Model 2 | | Model 3 | |
| --- | --- | --- | --- | --- | --- | --- |
| HR (95% CIs) | *P value* | HR (95% CIs) | *P value* | HR (95% CIs) | *P value* |
| **TC level, mg/dl** |  |  |  |  |  |  |
| 30-Day all-cause mortality |  |  |  |  |  |  |
| 24-158 | 1.0 |  | 1.0 |  | 1.0 |  |
| 159-301 | 0.61  (0.42, 0.88) | 0.009 | 0.73  (0.50, 1.06) | 0.098 | 0.84  (0.57, 1.23) | 0.365 |
| 90-Day all-cause mortality |  |  |  |  |  |  |
| 24-158 | 1.0 |  | 1.0 |  | 1.0 |  |
| 159-301 | 0.54  (0.39, 0.75) | ＜0.001 | 0.66  (0.48, 0.92) | 0.013 | 0.81  (0.58, 1.13) | 0.213 |
| One-Year all-cause mortality |  |  |  |  |  |  |
| 24-158 | 1.0 |  | 1.0 |  | 1.0 |  |
| 159-301 | 0.49  (0.38, 0.64) | ＜0.001 | 0.59  (0.46, 0.77) | ＜0.001 | 0.72  (0.55, 0.95) | 0.019 |
| **TG level, mg/dl** |  |  |  |  |  |  |
| 30-Day all-cause mortality |  |  |  |  |  |  |
| 14-111 | 1.0 |  | 1.0 |  | 1.0 |  |
| 112-284 | 0.65  (0.45, 0.93) | 0.020 | 0.75  (0.52, 1.09) | 0.132 | 0.85  (0.58, 1.24) | 0.395 |
| 90-Day all-cause mortality |  |  |  |  |  |  |
| 14-111 | 1.0 |  | 1.0 |  | 1.0 |  |
| 112-284 | 0.54  (0.39, 0.75) | ＜0.001 | 0.64  (0.46, 0.88) | 0.007 | 0.70  (0.50, 0.98) | 0.036 |
| One-Year all-cause mortality |  |  |  |  |  |  |
| 14-111 | 1.0 |  | 1.0 |  | 1.0 |  |
| 112-284 | 0.66  (0.51, 0.85) | 0.001 | 0.78  (0.60, 1.00) | 0.053 | 0.82  (0.63, 1.06) | 0.138 |
| **Non-HDL-C, mg/dl** |  |  |  |  |  |  |
| 30-Day all-cause mortality |  |  |  |  |  |  |
| ＜100 | 1.0 |  | 1.0 |  | 1.0 |  |
| ≥100 | 0.60  (0.42, 0.86) | 0.005 | 0.74  (0.51, 1.07) | 0.108 | 0.86  (0.59, 1.24) | 0.413 |
| 90-Day all-cause mortality |  |  |  |  |  |  |
| ＜100 | 1.0 |  | 1.0 |  | 1.0 |  |
| ≥100 | 0.52  (0.38, 0.72) | ＜0.001 | 0.66  (0.48, 0.91) | 0.013 | 0.78  (0.56, 1.08) | 0.133 |
| One-Year all-cause mortality |  |  |  |  |  |  |
| ＜100 | 1.0 |  | 1.0 |  | 1.0 |  |
| ≥100 | 0.50  (0.39, 0.64) | ＜0.001 | 0.64  (0.49, 0.82) | ＜0.001 | 0.76  (0.59, 0.99) | 0.041 |
| **RLP-C, mg/dl** |  |  |  |  |  |  |
| 30-Day all-cause mortality |  |  |  |  |  |  |
| 1-21 | 1.0 |  | 1.0 |  | 1.0 |  |
| 22-79 | 0.67  (0.47, 0.96) | 0.030 | 0.78  (0.54, 1.12) | 0.183 | 0.88  (0.61, 1.28) | 0.506 |
| 90-Day all-cause mortality |  |  |  |  |  |  |
| 1-21 | 1.0 |  | 1.0 |  | 1.0 |  |
| 22-79 | 0.58  (0.42, 0.79) | ＜0.001 | 0.68  (0.49, 0.94) | 0.020 | 0.76  (0.55, 1.06) | 0.103 |
| One-Year all-cause mortality |  |  |  |  |  |  |
| 1-21 | 1.0 |  | 1.0 |  | 1.0 |  |
| 22-79 | 0.72  (0.56, 0.93) | 0.011 | 0.86  (0.67, 1.11) | 0.241 | 0.94  (0.73, 1.22) | 0.654 |

**Abbreviations:** HR: hazard ratio; CI: confidence interval; TC: total cholesterol; TG: triglycerides; Non-HDL-C: non-high density lipoprotein cholesterol; RLP-C: remnant lipoprotein cholesterol.

**Notes:** Models 1, 2 and 3 were derived from Cox proportional hazards regression models: model 1 covariates were adjusted for nothing; model 2 covariates were adjusted for age, sex and ethnicity;model 3 covariates were adjusted for age, sex, ethnicity, serum urea nitrogen, serum creatinine, mean arterial pressure, coronary heart disease, cardiogenic shock.

**Table S2** HRs (95% CIs) for all-cause mortality across groups of LDL-C level

| LDL-C level, mg/dl | Model 1 | | Model 2 | | Model 3 | |
| --- | --- | --- | --- | --- | --- | --- |
| HR (95% CIs) | *P value* | HR (95% CIs) | *P value* | HR (95% CIs) | *P value* |
| **Divided into four groups** |  |  |  |  |  |  |
| 30-Day all-cause mortality |  |  |  |  |  |  |
| ＜64 | 1 |  | 1 |  | 1 |  |
| 64 - 86 | 0.51 (0.31, 0.83) | 0.007 | 0.55 (0.34, 0.90) | 0.019 | 0.70 (0.42, 1.16) | 0.169 |
| 87 - 113 | 0.67 (0.43, 1.05) | 0.081 | 0.76 (0.49, 1.19) | 0.232 | 1.08 (0.68, 1.73) | 0.740 |
| ＞113 | 0.30 (0.17, 0.54) | <0.001 | 0.36 (0.20, 0.65) | <0.001 | 0.53 (0.29, 0.97) | 0.039 |
| 90-Day all-cause mortality |  |  |  |  |  |  |
| ＜64 | 1 |  | 1 |  | 1 |  |
| 64 - 86 | 0.54 (0.36, 0.82) | 0.004 | 0.59 (0.39, 0.89) | 0.012 | 0.75 (0.49, 1.16) | 0.199 |
| 87 - 113 | 0.62 (0.42, 0.91) | 0.016 | 0.70 (0.47, 1.04) | 0.078 | 1.06 (0.70, 1.60) | 0.801 |
| ＞113 | 0.27 (0.16, 0.45) | <0.001 | 0.33 (0.19, 0.55) | <0.001 | 0.50 (0.29, 0.87) | 0.013 |
| One-Year all-cause mortality |  |  |  |  |  |  |
| ＜64 | 1 |  | 1 |  | 1 |  |
| 64 - 86 | 0.65 (0.47, 0.89) | 0.008 | 0.70 (0.51, 0.97) | 0.032 | 0.90 (0.64, 1.25) | 0.512 |
| 87 - 113 | 0.64 (0.46, 0.88) | 0.006 | 0.73 (0.53, 1.00) | 0.053 | 1.09 (0.78, 1.52) | 0.630 |
| ＞113 | 0.26 (0.17, 0.40) | <0.001 | 0.32 (0.21, 0.50) | <0.001 | 0.49 (0.31, 0.76) | 0.002 |
| **Divided into five groups** |  |  |  |  |  |  |
| 30-Day all-cause mortality |  |  |  |  |  |  |
| ＜59 | 1 |  | 1 |  | 1 |  |
| 59 - 76 | 0.47 (0.28, 0.81) | 0.006 | 0.51 (0.30, 0.88) | 0.015 | 0.66 (0.38, 1.13) | 0.130 |
| 77 - 96 | 0.46 (0.27, 0.78) | 0.004 | 0.51 (0.29, 0.87) | 0.013 | 0.74 (0.42, 1.30) | 0.294 |
| 97 - 120 | 0.62 (0.38, 1.02) | 0.059 | 0.74 (0.45, 1.21) | 0.225 | 1.16 (0.68, 1.95) | 0.588 |
| ＞120 | 0.27 (0.14, 0.52) | <0.001 | 0.33 (0.17, 0.64) | 0.001 | 0.51 (0.26, 1.00) | 0.049 |
| 90-Day all-cause mortality |  |  |  |  |  |  |
| ＜59 | 1 |  | 1 |  | 1 |  |
| 59 - 76 | 0.47 (0.30, 0.73) | 0.001 | 0.50 (0.32, 0.79) | 0.003 | 0.63 (0.40, 1.01) | 0.056 |
| 77 - 96 | 0.42 (0.26, 0.66) | <0.001 | 0.46 (0.29, 0.73) | 0.001 | 0.69 (0.42, 1.12) | 0.136 |
| 97 - 120 | 0.52 (0.34, 0.80) | 0.003 | 0.62 (0.40, 0.96) | 0.031 | 1.03 (0.64, 1.64) | 0.907 |
| ＞120 | 0.24 (0.14, 0.42) | <0.001 | 0.30 (0.17, 0.53) | <0.001 | 0.48 (0.26, 0.86) | 0.014 |
| One-Year all-cause mortality |  |  |  |  |  |  |
| ＜59 | 1 |  | 1 |  | 1 |  |
| 59 - 76 | 0.55 (0.39, 0.78) | <0.001 | 0.59 (0.41, 0.83) | 0.003 | 0.73 (0.51, 1.05) | 0.090 |
| 77 - 96 | 0.49 (0.35, 0.71) | <0.001 | 0.55 (0.38, 0.78) | 0.001 | 0.81 (0.56, 1.19) | 0.282 |
| 97 - 120 | 0.48 (0.33, 0.69) | <0.001 | 0.58 (0.40, 0.83) | 0.003 | 0.92 (0.63, 1.36) | 0.686 |
| ＞120 | 0.24 (0.15, 0.38) | <0.001 | 0.30 (0.19, 0.49) | <0.001 | 0.48 (0.29, 0.77) | 0.003 |

**Abbreviations:** HR: hazard ratio, CI: confidence interval; LDL-C: low density lipoprotein cholesterol.

**Notes:** Models 1, 2 and 3 were derived from Cox proportional hazards regression models: model 1 covariates were adjusted for nothing; model 2 covariates were adjusted for age, sex and ethnicity;model 3 covariates were adjusted for age, sex, ethnicity, serum urea nitrogen, serum creatinine, mean arterial pressure, coronary heart disease, cardiogenic shock.
